# Supplementary material
Source: PubMed Central journal article supplement (PMC2441661)

**E08-02-0128 Pederson**

**SUPPLEMENTAL FIGURE LEGEND**

**FIGURE S1. Induction of NS-GFP in U2OS<sup>iNS-GFP</sup> cells.**

Left: uninduced cells; right: induced cells, 24 hours after the addition of doxycycline.

Top: phase-contrast; bottom: fluorescence. Note the widespread induction throughout the population and the uniform nucleolar localization. Bar, 50

Uninduced

Induced

Phase

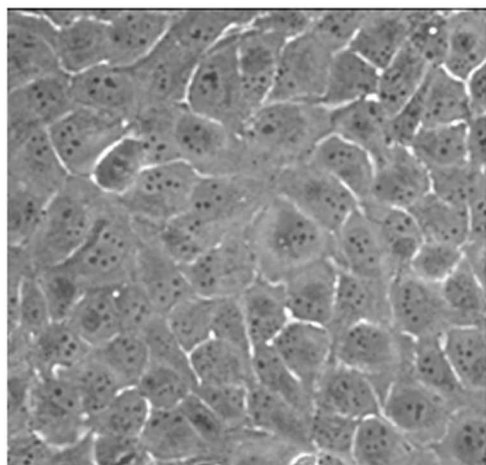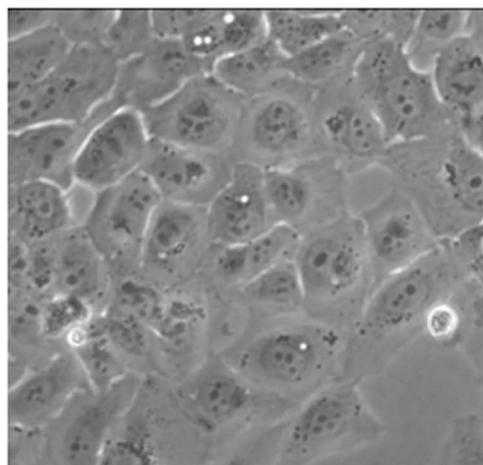

NS-GFP

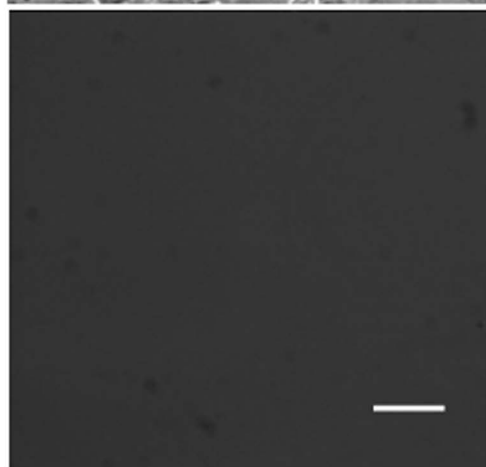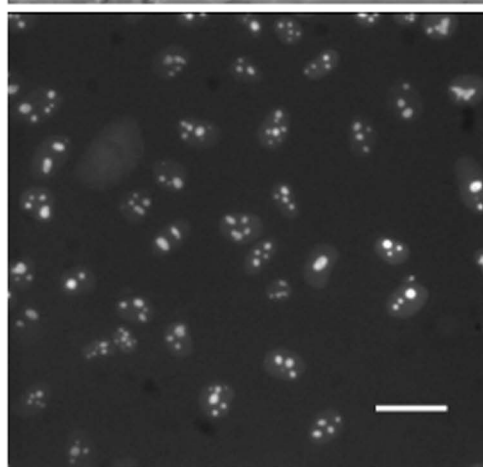

Supplement: E08-02-0128_1.pdf [file E08-02-0128_1.pdf]
